# Supplementary material for: Nej1 Interacts with Mre11 to Regulate Tethering and Dna2 Binding at DNA Double-Strand Breaks
Source: PubMed Central journal article supplement — Cell Rep. Author manuscript; Available in PMC 2019 Sep 16. (PMC6746346; doi:10.1016/j.celrep.2019.07.018), 2019-08-06
Supplement: NIHMS1536804-supplement-1.pdf [file NIHMS1536804-supplement-1.pdf]

**Cell Reports, Volume 28**

**Supplemental Information**

**Nej1 Interacts with Mre11  
to Regulate Tethering and Dna2 Binding  
at DNA Double-Strand Breaks**

**Aditya Mojumdar, Kyle Sorenson, Marcel Hohl, Mathias Toulouze, Susan P. Lees-Miller, Karine Dubrana, John H.J. Petrini, and Jennifer A. Cobb**

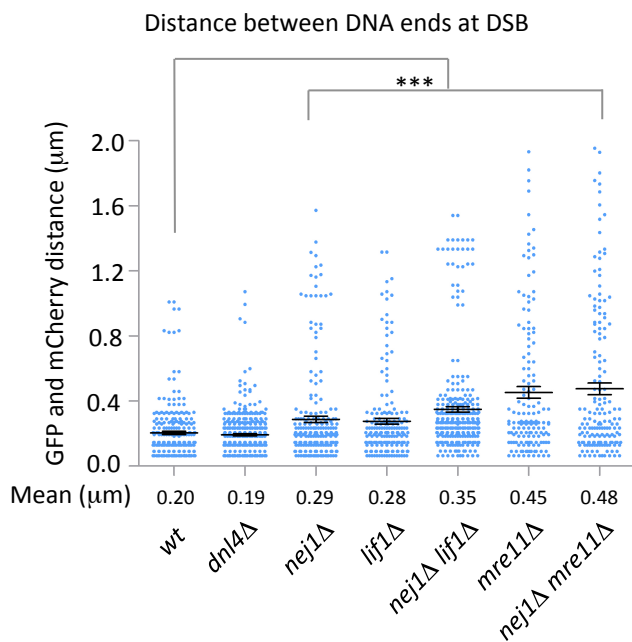

**Figure S1 : Scatter data plot showing the tethering of DSB ends in various mutants. Related to Figure 2.** The distance between the GFP and mCherry foci was measured in wild type (JC- 4066), *dnl4*Δ (KD-1106), *nej1*Δ (JC-4364), *lif1*Δ (KD-1069), *nej1*Δ *lif1*Δ (KD-1075), *mre11*Δ (KD-925) and *nej1*Δ *mre11*Δ (KD-1108).

This work was performed in the Dubrana Lab. For HO endonuclease induction, strains were grown on rich medium containing 3% glycerol, 2% lactic acid and 0.05% glucose prior adding 2% galactose for 2h and imaging. Live cell images were acquired using a wide-field microscope based on an inverted microscope (Leica DMI-6000B) equipped with Adaptive Focus Control to eliminate Z drift, a 100x/1.4 NA immersion objective with a Prior NanoScanZ Nanopositioning Piezo Z Stage System, a CMOS camera (ORCA-Flash4.0; Hamamatsu) and a solid state light source (SpectraX, Lumencore). The system is piloted by MetaMorph software (Molecular Device).

For GFP-mCherry two-color images, 25 focal steps of 0.2µm were acquired sequentially for GFP and mRFP with an exposure time of 50ms using solid state 475 and 575 nm diodes and appropriate filters (GFP-mRFP filter; excitation: double BP, 450–490/550–590 nm and dichroic double BP 500–550/600–665 nm; Chroma Technology Corp.). Distance measurement were performed on 2D maximal projection of three-dimensional data sets using Volocity software (PerkinElmer).

**A**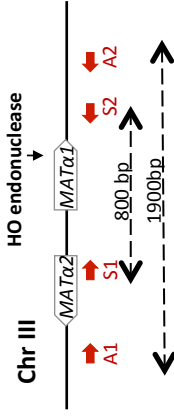**B**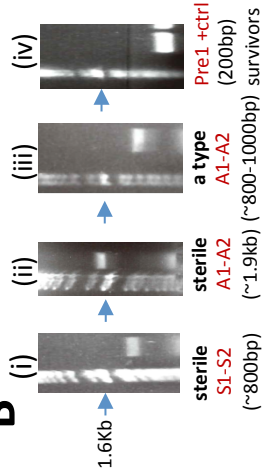**C** 20 sterile survivors for each genotype

| Genotype              | events                                           |
|-----------------------|--------------------------------------------------|
| WT                    | +CA(9), ΔACA(5), ΔA(3), +ACA(3)                  |
| rad50Δ                | ΔC(6), ΔACA(7), ΔA(3), ΔCA(4)                    |
| rad50sc+h             | ΔC(5), ΔACA(6), ΔA(3), ΔAC(2), +CA(4)            |
| rad50sc+h N873I       | ΔACA(5), ΔA(3), ΔAC(2), +CA(4), +ACA(4), ΔGCA(2) |
| nej1Δ rad50sc+h       | ΔACA(5), ΔA(2), ΔC(5), ΔAC(1), Δ107bp (7)        |
| nej1Δ rad50sc+h N873I | ΔGCA(3), ΔACAG(1), ΔA(2), ΔC(5), Δ107bp (9)      |

rad50Δ S1-S2-

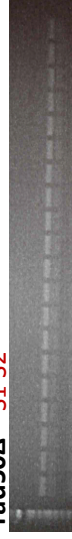

rad50sc+h S1-S2-

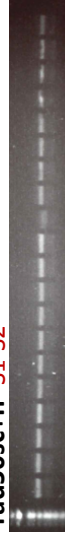

rad50sc+h N873I S1-S2-

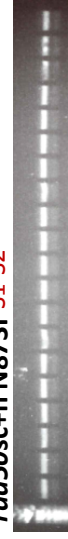

nej1Δ

a type 1-20

S1-S2

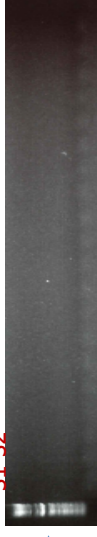

Pre1 control

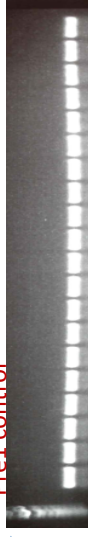

A1-A2

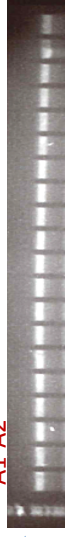

nej1Δ rad50sc+h

S1-S2 - Sterile 1-10

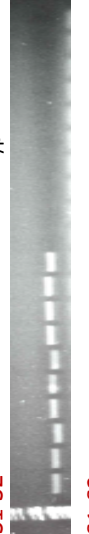

S1-S2 - Sterile 11-20

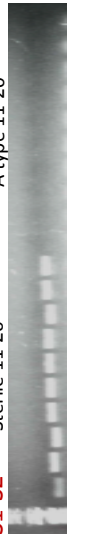

A1-A2

A type 1-20

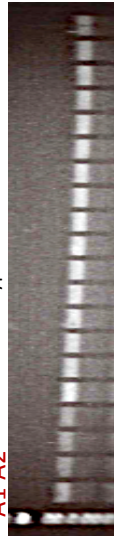

Pre1 control

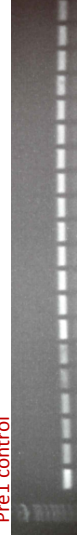

nej1Δ rad50sc+h N873I

S1-S2 - Sterile 1-10

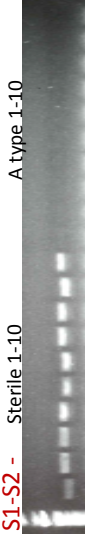

S1-S2 - Sterile 11-20

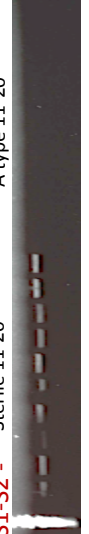

A1-A2

A type 1-20

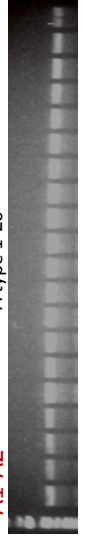

Pre1 control

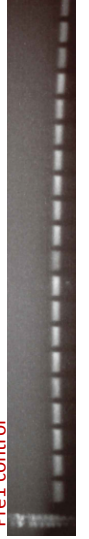

rad50 nej1Δ

a type 1-20

S1-S2

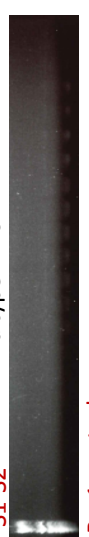

Pre1 control

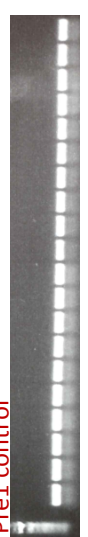

A1-A2

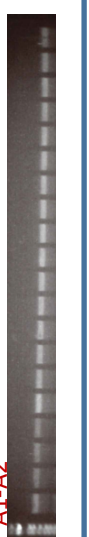

**Figure S2 : Survivors were verified by PCR and DNA sequencing. Related to Figure 3.** (A) Schematic representation of DSB site in Chromosome III and with primer sets (S1-S2 and A1-A2) used to verify the mutations in sterile and a-type survivors. (B) PCR products using various primer sets - (i) ~800bp PCR product from sterile-type survivors using S1-S2, (ii) ~1900bp PCR product from sterile-type survivors using A1-A2, (iii) ~1000bp PCR product from a-type survivors using A1-A2, (iv) 200bp PCR product from survivors using Pre1 primers. (C.) Sterile survivors were sequenced for WT (JC-727), *rad50* $\Delta$  (JC-3313), *rad50sc+h* (JC-4424), *rad50sc+h* N873I (JC-4561), *nej1* $\Delta$  *rad50sc+h* (JC-4476) and *nej1* $\Delta$  *rad50sc+h* N873I (JC-4597). Survivors that were a type were verified to have large genomic deletions of ~800-1100bp by DNA sequencing the PCR product amplified with A1-A2.

Agarose gel pictures showing the PCR products obtained from sterile and a-type survivors using S1-S2, A1-A2 and Pre1 primer set, in the strains WT (JC-727), *rad50* $\Delta$  (JC-3313), *rad50sc+h* (JC-4424), *rad50sc+h* N873I (JC-4561), *nej1* $\Delta$  (JC-1342), *nej1* $\Delta$  *rad50* $\Delta$  (JC-3314), *nej1* $\Delta$  *rad50sc+h* (JC-4476) and *nej1* $\Delta$  *rad50sc+h* N873I (JC-4597). The Pre1 primer set was used with all strains but not all are included here due to spacing.

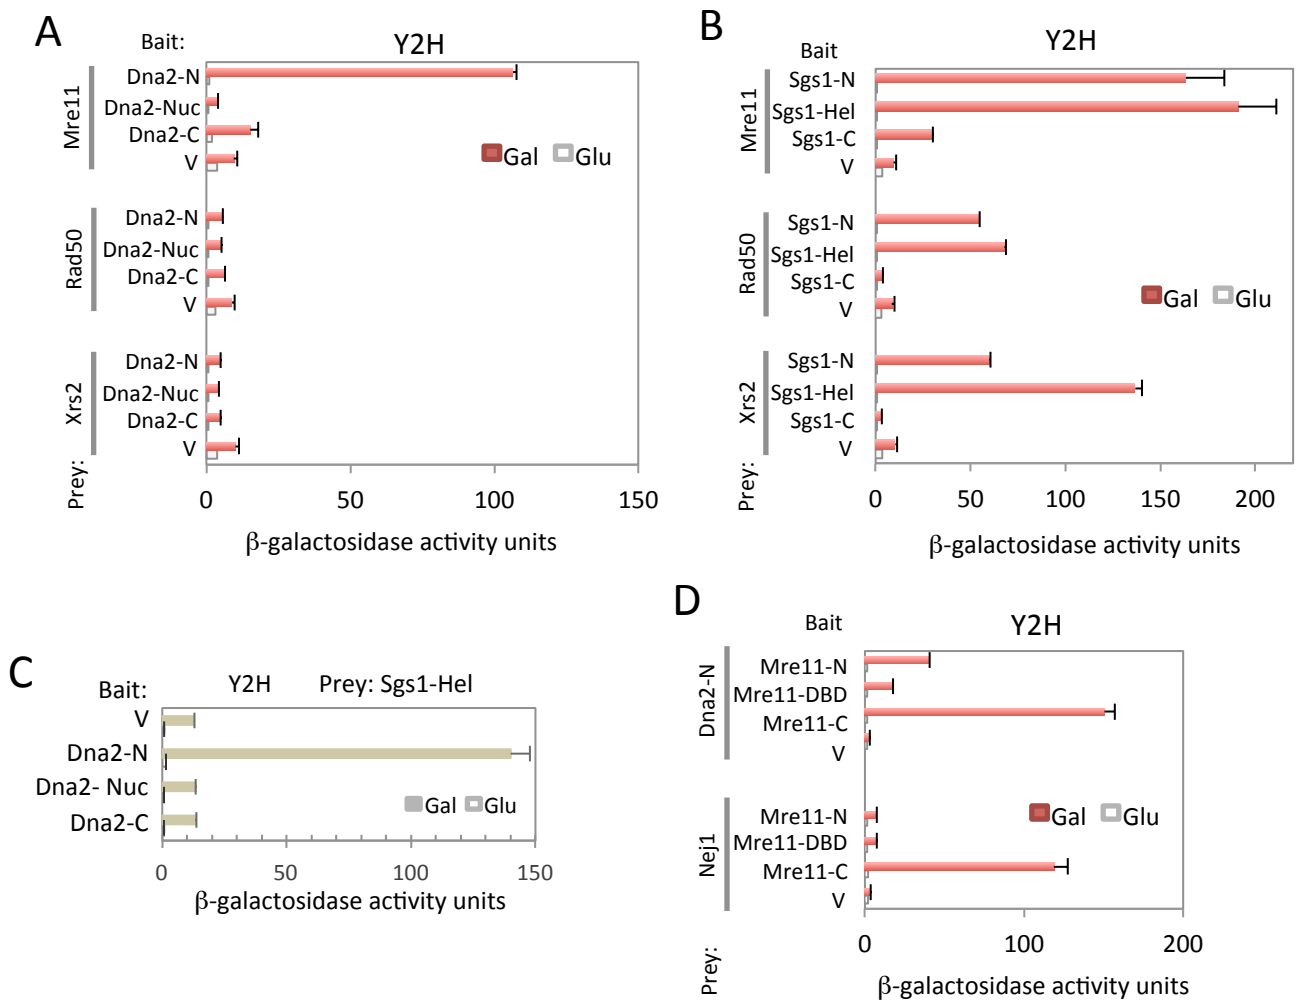

**Figure S3: Interaction of MRX with Sgs1 and Dna2. Related to Figure 4.** (A and B) Y2H analysis, between regions of Dna2 and Sgs1 fused to *lexA*-DBD and Mre11, Rad50 and Xrs2 fused to HA-AD, was performed using a quantitative  $\beta$ -galactosidase assay. (C) Y2H analysis, between Helicase domain of Sgs1 and regions of Dna2, was performed using a quantitative  $\beta$ -galactosidase assay. (D) Y2H analysis, between N-terminal region of Dna2 or Nej1 and regions of Mre11, was performed using a quantitative  $\beta$ -galactosidase assay.

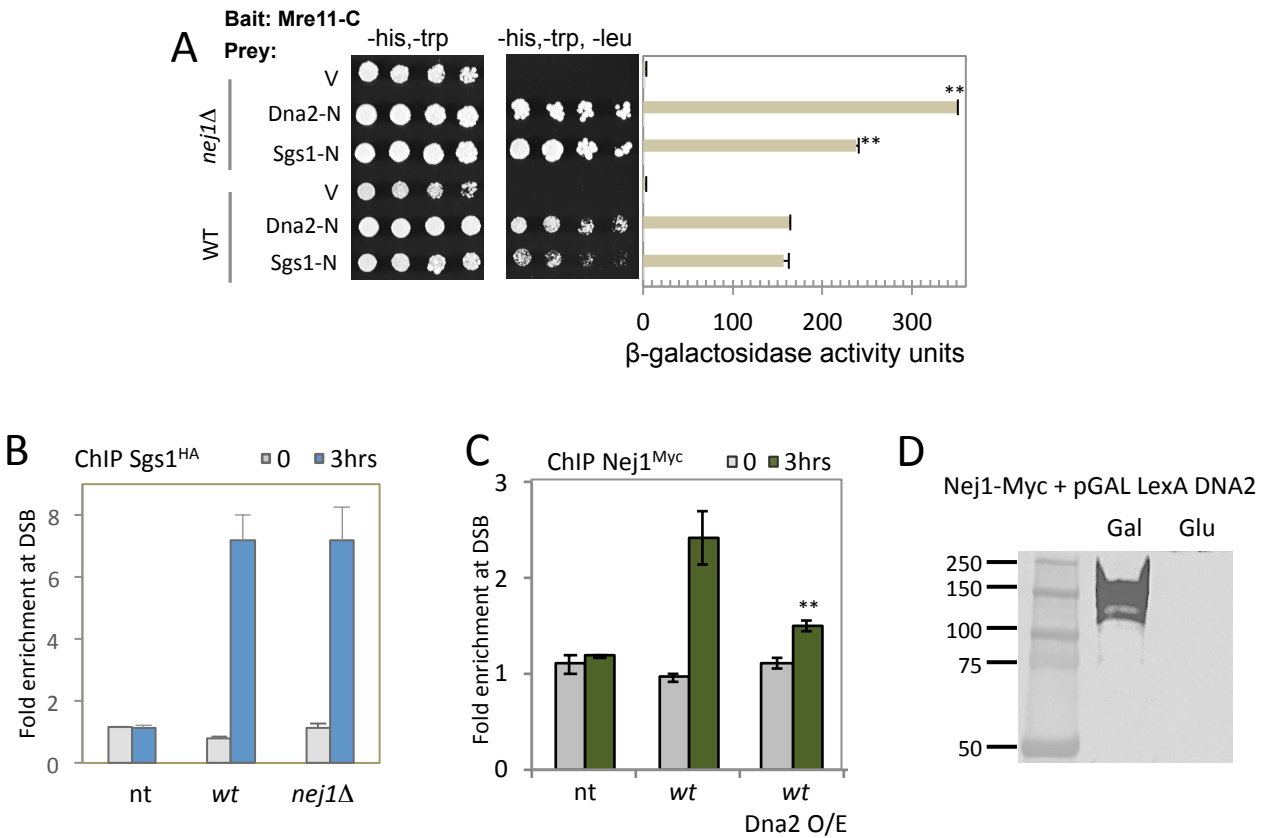

**Figure S4: Interplay between Nej1 with Dna2-Sgs1 for interaction with Mre11-C and recruitment to the DSB. Related to Figure 4.** (A) Y2H analysis, between Sgs1-N or Dna2-N and Mre11-C, was performed in wild type cells and in isogenic cells with *nej1Δ* using a quantitative  $\beta$ -galactosidase assay and a drop assay on drop-out (-His, -Trp, -Leu) selective media plates. (B) Enrichment of Sgs1<sup>HA</sup> at DSB, at 0 and 3 hour time point, in wild type (JC-4135) and *nej1Δ* (JC-4136) were determined at 0.6kb from DSB. (C) Enrichment of Nej1<sup>Myc</sup> at DSB, at 0 and 3 hour time point, in wild type (JC-4135) + Y2H plasmid J-965 with or without full length with Dna2 O/E under galactose induction. (D) Cells were grown overnight in -URA with 2% raffinose. Next day, cells were transferred into -URA media with either 2% GLU or 2% GAL for 3 hrs at 30°C for induction of HO and O/E of Dna2. The lower enrichment for Nej1 WT here compared to Fig.1A is like due to growth in selective media.

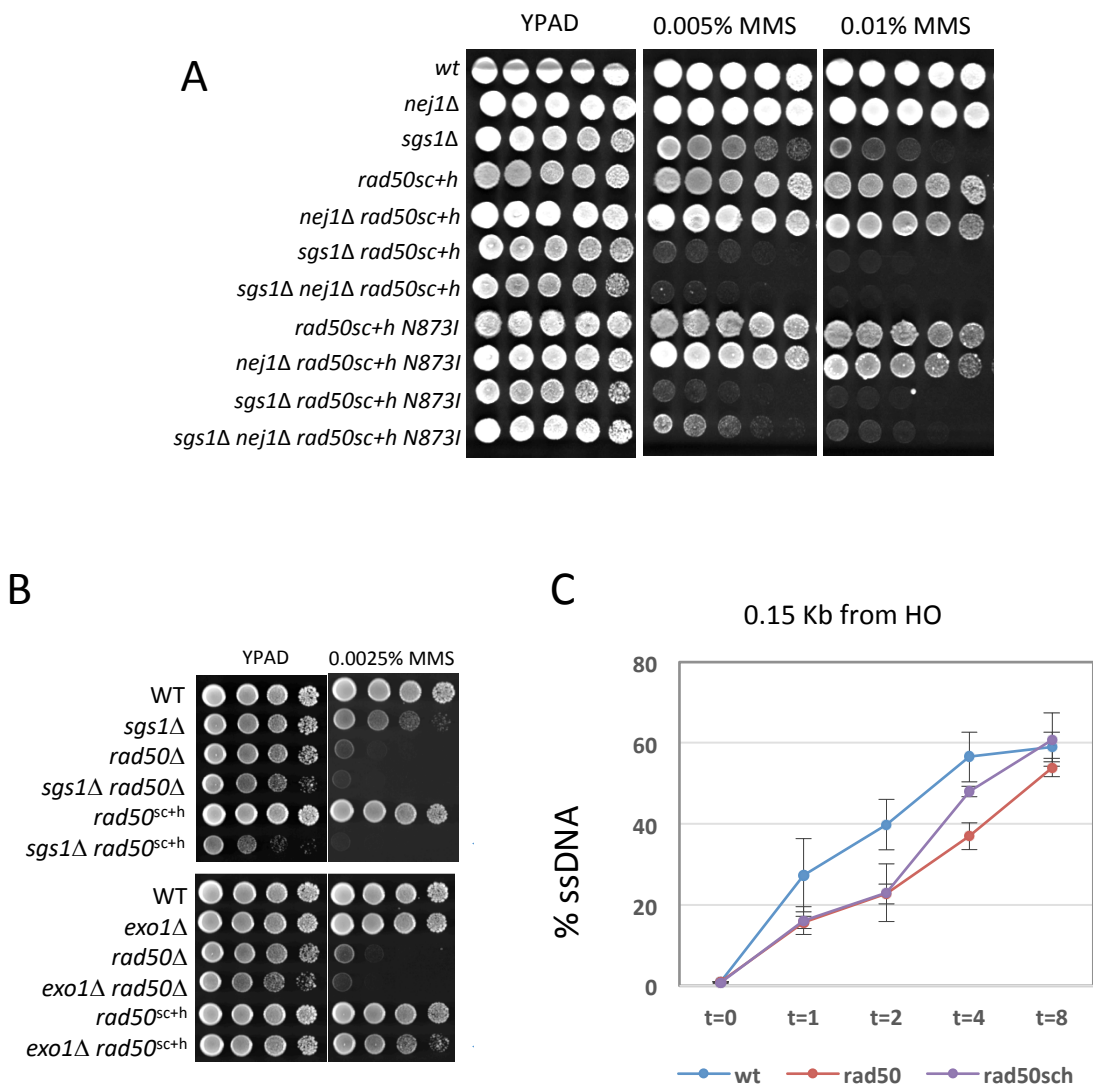

**Figure S5. Genetic interactions and resection in *rad50Δ* and *rad50sc+h*. Related to Figure 6.**

(A) Five-fold serial dilutions were spotted on YPAD, YPAD + 0.005% MMS and YPAD + 0.01% MMS. Strains used include wild type (JC-727), *nej1Δ* (JC-1342), *sgs1Δ* (JC-3757), *rad50sc+h* (JC-4424), *nej1Δ rad50sc+h* (JC-4476), *sgs1Δ rad50sc+h* (JC-4478), *nej1Δ sgs1Δ rad50sc+h* (JC-4479), *rad50sc+h* N873I (JC-4561), *nej1Δ rad50sc+h* N873I (JC-4597), *sgs1Δ rad50sc+h* N873I (JC-4607) and *nej1Δ sgs1Δ rad50sc+h* N873I (JC-4605).

(B) Five-fold serial dilutions of the following strains were spotted on YPAD and YPAD + 0.0025% MMS. Strains used include wild type (JC-727), *sgs1Δ* (JC-3757), *rad50Δ* (JC-3313), *sgs1Δ rad50Δ* (JC-3760), *rad50sc+h* (JC-4424) and *rad50sc+h sgs1Δ* (JC-4478) *exo1Δ* (JC-3767), *rad50Δ exo1Δ* (JC-3769), *rad50sc+h exo1Δ* (JC-4519).

(C) Resection of DNA 0.15kb away from the HO DSB, as measured by %ssDNA, 0 to 8 hrs post DSB induction in asynchronous cells in wild type (JC-3585), *rad50Δ* (JC-3882) and *rad50sc+h* (JC-4458). Error bars represent the standard error of three replicates.

**A****Proteins with LexA tag expressed in pGAL-LexA plasmid**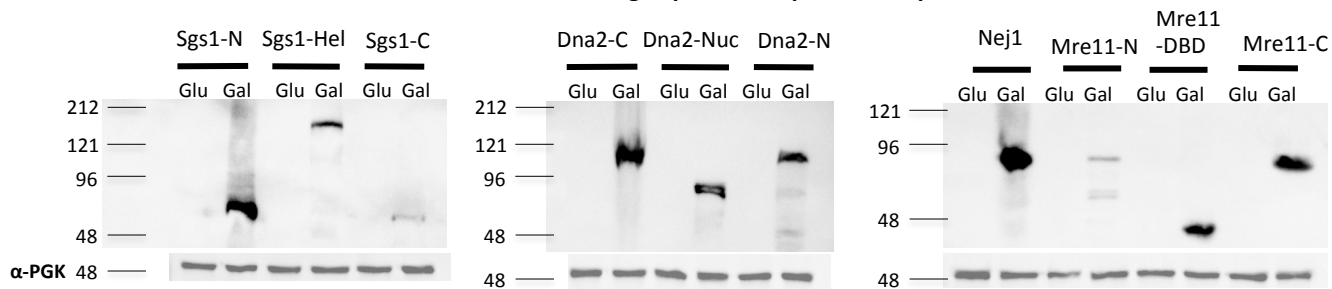**B****Proteins with HA tag expressed in pJG4-6 plasmid**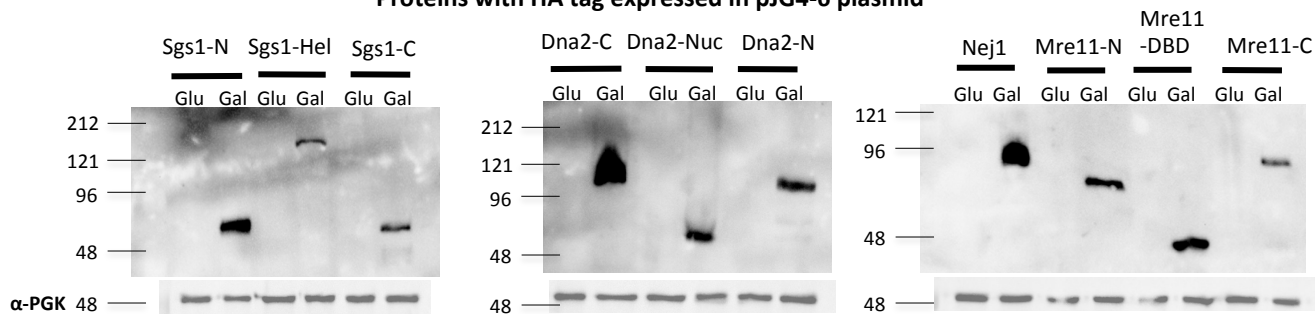

**Figure S6. Expression of proteins upon galactose induction. Related to Figure 1 and 4.** (A) Western blots showing the expression of proteins fused to LexA tag upon galactose induction. (B) Western blots showing the expression of proteins fused to HA tag upon galactose induction. Polyglycerate kinase (PGK) was used as a loading control.



**Table S1. Yeast strains used in this study. Related to Figures 1-6 and Figures S1-S6.**

| Strain  | Genotype                                                                                                  | Reference                      |
|---------|-----------------------------------------------------------------------------------------------------------|--------------------------------|
| JC-727  | MAT $\alpha$ ; <i>hml::ADE1 hmr::ADE1 ade3::GAL-HO ade1-100 leu2-3, 112 lys5 trp1::hisG ura3-52</i>       | JKM179, [Lee et al. 1998]      |
| JC-1280 | MAT $\alpha$ ; <i>leu2::proLeu2-lexAop6 his3 ura3-52</i>                                                  | This study                     |
| JC-1342 | JC-727 with <i>nej1<math>\Delta</math>::KanMX6</i>                                                        | MAV015, [Valencia et al. 2001] |
| JC-1687 | JC-727 with <i>NEJ1-13MYC::TRP1</i>                                                                       | Sorenson et al. 2017           |
| JC-3306 | JC-727 with <i>RAD50-6HA::TRP1</i>                                                                        | This study                     |
| JC-3311 | JC-1687 with <i>rad50<math>\Delta</math>::NatRMX4</i>                                                     | This study                     |
| JC-3313 | JC-727 with <i>rad50<math>\Delta</math>::URA3</i>                                                         | Sorenson et al. 2017           |
| JC-3314 | JC-3313 with <i>nej1<math>\Delta</math>::KanMX6</i>                                                       | Sorenson et al. 2017           |
| JC-3319 | JC-727 with <i>LIF1-6HA::TRP1</i>                                                                         | This study                     |
| JC-3585 | MAT $\alpha$ ; <i>hml::ADE1 hmr::ADE1 ade3::GAL-HO ade1-100 leu2-3, 112 lys5 trp1::hisG ura3-52</i>       | Sorenson et al. 2017           |
| JC-3677 | JC-1687 with <i>mre11<math>\Delta</math>::KanMX6</i>                                                      | This study                     |
| JC-3688 | JC-1280 with <i>rad50<math>\Delta</math>::KanMX6</i>                                                      | This study                     |
| JC-3757 | JC-727 with <i>sgs1<math>\Delta</math>::NatRMX4</i>                                                       | This study                     |
| JC-3760 | JC-3313 with <i>sgs1<math>\Delta</math>::NatRMX4</i>                                                      | This study                     |
| JC-3767 | JC-727 with <i>exo1<math>\Delta</math>::NatRMX4</i>                                                       | This study                     |
| JC-3769 | JC-3313 with <i>exo1<math>\Delta</math>::NatRMX4</i>                                                      | This study                     |
| JC-3882 | JC-3585 with <i>rad50<math>\Delta</math>::URA3</i>                                                        | This study                     |
| JC-3884 | JC-3585 with <i>nej1<math>\Delta</math>::KanMX6</i>                                                       | This study                     |
| JC-3887 | JC-3882 with <i>nej1<math>\Delta</math>::KanMX6</i>                                                       | This study                     |
| JC-4066 | JC-3585 with <i>ura3::LacI-mCherry-URA3; leu2::TetR-GFP-LEU2; TAF2-LacOpFx-TRP1; 4.4kb MAT-TetO-LEU2.</i> | This study                     |
| JC-4094 | JC-4066 with <i>rad50<math>\Delta</math>::NatRMX4</i>                                                     | This study                     |
| JC-4117 | JC-727 with <i>DNA2-6HA::TRP1</i>                                                                         | This study                     |
| JC-4118 | JC-4117 with <i>nej1<math>\Delta</math>::KanMX6</i>                                                       | This study                     |
| JC-4135 | JC-727 with <i>SGS1-6HA::TRP1</i>                                                                         | This study                     |
| JC-4136 | JC-4135 with <i>nej1<math>\Delta</math>::KanMX6</i>                                                       | This study                     |
| JC-4138 | JC-4135 with <i>rad50<math>\Delta</math>::URA3</i>                                                        | This study                     |
| JC-4355 | JC-4094 with <i>nej1<math>\Delta</math>::KanMX6</i>                                                       | This study                     |
| JC-4364 | JC-4066 with <i>nej1<math>\Delta</math>::KanMX6</i>                                                       | This study                     |
| JC-4424 | JC-727 with <i>rad50sc+h::HphMX4</i>                                                                      | This study                     |
| JC-4425 | JC-727 with <i>rad50sc::HphMX4</i>                                                                        | This study                     |
| JC-4457 | JC-4424 with <i>SGS1-6HA::TRP1</i>                                                                        | This study                     |
| JC-4458 | JC-3585 with <i>rad50sc+h::HphMX4</i>                                                                     | This study                     |
| JC-4466 | JC-4066 with <i>rad50sc+h::HphMX4</i>                                                                     | This study                     |
| JC-4471 | JC-4458 with <i>nej1<math>\Delta</math>::KanMX6</i>                                                       | This study                     |
| JC-4476 | JC-4424 with <i>nej1<math>\Delta</math>:: KanMX6</i>                                                      | This study                     |
| JC-4478 | JC-4424 with <i>sgs1<math>\Delta</math>::NatRMX4</i>                                                      | This study                     |
| JC-4479 | JC-4476 with <i>sgs1<math>\Delta</math>::NatRMX4</i>                                                      | This study                     |
| JC-4496 | JC-727 with <i>RAD50sc-6HA::TRP1</i>                                                                      | This study                     |
| JC-4497 | JC-727 with <i>RAD50sc+h-6HA::TRP1</i>                                                                    | This study                     |
| JC-4502 | JC-4117 with <i>sgs1<math>\Delta</math>::NatRMX4</i>                                                      | This study                     |

|         |                                            |            |
|---------|--------------------------------------------|------------|
| JC-4503 | JC-4117 with <i>rad50Δ::URA3</i>           | This study |
| JC-4515 | JC-727 with <i>XRS2-6HA::TRP1</i>          | This study |
| JC-4516 | JC-4515 with <i>rad50Δ::URA3</i>           | This study |
| JC-4517 | JC-4515 with <i>rad50sc::HphMX4</i>        | This study |
| JC-4518 | JC-4515 with <i>rad50sc+h::HphMX4</i>      | This study |
| JC-4519 | JC-4424 with <i>exo1Δ::NatRMX4</i>         | This study |
| JC-4526 | JC-1687 with <i>rad50sc+h::HphMX4</i>      | This study |
| JC-4528 | JC-1687 with <i>sgs1Δ:: NatRMX4</i>        | This study |
| JC-4531 | JC-4117 with <i>rad50sc+h::HphMX4</i>      | This study |
| JC-4533 | JC-4466 with <i>nej1Δ:: KanMX6</i>         | This study |
| JC-4556 | JC-1280 with <i>nej1Δ::KanMX6</i>          | This study |
| JC-4559 | JC-4066 with <i>rad50sch-N873I::HphMX4</i> | This study |
| JC-4561 | JC-727 with <i>rad50sch-N873I::HphMX4</i>  | This study |
| JC-4563 | JC-4561 with <i>NEJ1-13MYC::TRP1</i>       | This study |
| JC-4564 | JC-4561 with <i>DNA2-6HA::TRP1</i>         | This study |
| JC-4565 | JC-4561 with <i>SGS1-6HA::TRP1</i>         | This study |
| JC-4566 | JC-3319 with <i>rad50sch-N873I::HphMX4</i> | This study |
| JC-4567 | JC-3585 with <i>rad50sch-N873I::HphMX4</i> | This study |
| JC-4569 | JC-4567 with <i>nej1Δ::KanMX6</i>          | This study |
| JC-4572 | JC-4515 with <i>rad50sch-N873I::HphMX4</i> | This study |
| JC-4579 | JC-3319 with <i>rad50sc+h::HphMX4</i>      | This study |
| JC-4580 | JC-4364 with <i>rad50sch-N873I::HphMX4</i> | This study |
| JC-4597 | JC-4561 with <i>nej1Δ::KanMX6</i>          | This study |
| JC-4605 | JC-4597 with <i>sgs1Δ:: NatRMX4</i>        | This study |
| JC-4607 | JC-4561 with <i>sgs1Δ:: NatRMX4</i>        | This study |
| KD-925  | JC-4066 with <i>mre11Δ::HphMX4</i>         | This study |
| KD-1069 | JC-4066 with <i>lif1Δ::KanMX6</i>          | This study |
| KD-1073 | JC-4066 with <i>nej1Δ::KanMX6</i>          | This study |
| KD-1075 | KD-1073 with <i>lif1Δ::KanMX6</i>          | This study |
| KD-1106 | JC-4066 with <i>dnl4Δ::KanMX6</i>          | This study |
| KD-1108 | KD-1073 with <i>mre11Δ::HphMX4</i>         | This study |

**Table S2. Plasmids used in this study. Related to Figures 1 and 4, and Figures S3-S4 and S6.**

| Plasmid number | Description                          |
|----------------|--------------------------------------|
| J-965          | pGAL-lexA                            |
| J-1493         | pJG4-6                               |
| J-359          | pSH18-34 lexAGal1-lacZ               |
| J-123          | J-1493 with Nej1                     |
| J-125          | J-965 with Nej1                      |
| J-183          | J-1493 with Xrs2                     |
| J-196          | J-1493 with Mre11                    |
| J-198          | J-1493 with Rad50                    |
| J-454          | J-1493 with Sgs1-(9-275) N-term      |
| J-455          | J-1493 with Sgs1-(290-1180) Helicase |
| J-572          | J-1493 with Sgs1-(1120-1430) C-term  |
| J-1043         | J-965 with Sgs1-(9-275) N-term       |
| J-1044         | J-965 with Sgs1-(290-1180) Helicase  |
| J-1045         | J-965 with Sgs1-(1120-1430) C-term   |
| J-1855         | J-965 with Dna2-(1-440) N-term       |
| J-1856         | J-965 with Dna2-(441-920) Nuclease   |
| J-1857         | J-965 with Dna2-(921-1522) C-term    |
| J-1858         | J-1493 with Dna2-(1-440) N-term      |
| J-1859         | J-1493 with Dna2-(441-920) Nuclease  |
| J-1860         | J-1493 with Dna2-(921-1522) C-term   |
| J-1868         | J-965 with Mre11-(1-271) N-term      |
| J-1869         | J-1493 with Mre11-(1-271) N-term     |
| J-1870         | J-965 with Mre11-(272-422) DBD       |
| J-1871         | J-1493 with Mre11-(272-422) DBD      |
| J-1872         | J-965 with Mre11-(423-692) C-term    |
| J-1873         | J-1493 with Mre11-(423-692) C-term   |

**Table S3. Primers and Probes used in this study. Related to STAR Methods**

| Primer Name         | Primer Sequence (5'-3')                     |
|---------------------|---------------------------------------------|
| HO2 Forward Primer  | TTGCCCACTTCTAAGCTGATTC                      |
| HO2 Reverse Primer  | GTACTTTTCTACATTGGGAAGCAATAAA                |
| HO2 Probe           | FAM-ATGATGTCTGGGTTTTGTTTGGGATGCA-TAMRA      |
| HO1 Forward Primer  | GTTCTCATGCTGTCGAGGATTTT                     |
| HO1 Reverse Primer  | AGACGTCCTTCTACAACAATTCATAAGT                |
| HO1 Probe           | FAM-TTTGGGACGATATTGTCATTATAGGGCAGTGTG-TAMRA |
| HO6 Forward Primer  | AATATGGGACTACTTCGCGCAACA                    |
| HO6 Reverse Primer  | CGTACCACGTA CTTCAGCATAA                     |
| HO6 Probe           | FAM-CCTGGTTTTGGTTTTGTAGAGTGGTTGACGA-TAMRA   |
| SMC2 Forward Primer | AATTGGATTTGGCTAAGCGTAATC                    |
| SMC2 Reverse Primer | CTCCAATGTCCCTCAA AATTCTT                    |
| SMC2 Probe          | FAM-CGACGCGAATCCATCTTCCCAAATAATT-TAMRA      |
| MAT1 Forward Primer | CCTGGTTTTGGTTTTGTAGAGTGG                    |
| MAT1 Reverse Primer | GAGCAAGACGATGGGGAGTTTC                      |
| MAT2 Forward Primer | ATTGCGACAAGGCTTCACCC                        |
| MAT2 Reverse Primer | CACATCACAGGTTTATTGGTTCC                     |
| Pre1 Forward Primer | CCCACAAGTCCTCTGATTTACATTTCG                 |
| Pre1 Reverse Primer | ATTCGATTGACAGGTGCTCCCTTTTC                  |
| S1                  | TCTTGCCCACTTCTAAGCTG                        |
| S2                  | TCGAAAGATAAACAACCTCC                        |
| A1                  | GTCGTCTTGTTCAAGAAGGT                        |
| A2                  | AAGTCATGTGAACCGCATGG                        |
| Dna2_F1             | GGAATTCATGCCCCGGAACGCCACAGAAGAACAAGAGGTCTG  |
| Dna2_R1320          | CGGGATCCCTATATTTTTTTCGTTCCAATTTTTGG         |
| Dna2_F1321          | GGAATTCATGCTAGAGTGTATAGACGGCAAAGG           |
| Dna2_R2760          | CGGGATCCCTAGGGATTTATAAATTGTACACGACC         |
| Dna2_F2761          | GGAATTCATGGCTAAAATTGGTATCTCCGTA AAAACG      |
| Dna2_R4566          | CGGGATCCTCAACTTTCATACTCTTGTAGAATTTCCTTTAT   |
| Sgs1_F27            | GGAATTCATGTTAAGAAGGGAGCACAAATGGTTAAAGG      |
| Sgs1_R828           | CGGGATCCCTAGTATTCCAAGGGGCTGGGCAGAATGC       |
| Sgs1_F870           | GGAATTCATGGCGACTACCGTCACTAAGGCATTAGC        |
| Sgs1_R3540          | CGGGATCCCTATTTTCTTAGCATTGGGACCAACTTTTCAC    |
| Sgs1_F3360          | GGAATTCATGAAAATTGTT CAGGCTA ACCATGACAC      |
| Sgs1_R4291          | CGGGATCCCTATAGCAGACTTCTTGGACGACTTACTG       |
| Nej1_F1             | GGAATTCATGGATTCTGAGTTGAAAGGGCAGCAGC         |
| Nej1_R1029          | CGGGATCCCTATTAGTTTTTTTATTCTCACCTTTCC        |
| Mre11_F1            | GGAATTCATGGACTATCCTGATCCAGACACAATAAG        |
| Mre11_R813          | CGGGATCCCTAACAAAGTGAAGTAGCTACAGATGAACCTGG   |
| Mre11_F814          | GGAATTCATGGAGGCTGAGGCACAACCCAAGTATGTC       |
| Mre11_R1266         | CGGGATCCCTAACCGGATTTTTTTTGATCTAGTTACAGG     |
| Mre11_F1267         | GGAATTCATGATAAATGGAACAAGCATCAGTGATAGAGATG   |
| Mre11_R2076         | CGGGATCCCTATTTTCTTTTCTTAGCAAGGAGACTTCCAAG   |
| Rad50_F1            | GGAATTCATGAGCGCTATCTATAAATTATCTATTTCAGG     |
| Rad50_R3936         | CGGGATCCCTATCAATAAGTGACTCTGTTAATATCGACC     |
| Xrs2_F1             | GGAATTCATGTGGGTAGTACGATAACCAGAATACATTGG     |
| Xrs2_R2562          | CGGGATCCCTATTATCCTTTTCTTCTTTTGAACGTAAACTTCG |
